# Supplementary material for: Aicardi–Goutières Syndrome associated mutations of RNase H2B impair its interaction with ZMYM3 and the CoREST histone-modifying complex
Source: PubMed Central journal article supplement (PMC6424451; doi:10.1371/journal.pone.0213553), 2019-03-19
Supplement: pone.0213553.s001.pdf [file pone.0213553.s001.pdf]

**Table S1. Primer sequences**

| <b>Name</b>               | <b>Sequence (5' to 3')</b>                                                                     |
|---------------------------|------------------------------------------------------------------------------------------------|
| 2B N-FLAG Fwd             | TAGCTAGCGCCACCATGGGAGCAGACTACAAGGACGATGACGACAAGGCC<br>GCTGGCGTGGACTGCG                         |
| 2B N-FLAG Rev             | ATGCGGCCGCTCAAACCTTTCCAATTTTTTTTTATTTTTTACCC                                                   |
| S159I Fwd                 | TATTACAAGTACATCAAAGAGAAGACAT                                                                   |
| S159I Rev                 | ATGTCTTCTCTTTGATGTACTTGTAAATA                                                                  |
| K162T Fwd                 | CAGCAAAGAGACGACATTAAGTGG                                                                       |
| K162T Rev                 | CCACTTTAATGTCGTCTCTTTGCTG                                                                      |
| T163I Fwd                 | GCAAAGAGAAGATATTAAGTGGC                                                                        |
| T163I Rev                 | GCCACTTTAATATCTTCTCTTTGC                                                                       |
| V185G Fwd                 | ATAATGTGAATGGCAGTTCCCGGGTA                                                                     |
| V185G Rev                 | TACCCGGGAAGTCCATTACATTAT                                                                       |
| hsZMYM3 N-HA Fwd          | CGCTTAAGCCACCATGTACCCATACGATGTTCCAGATTACGCTGGAGCTGA<br>CCCCAGTGATTTCCC                         |
| hsZMYM3 Rev               | CAGCGGCCGCTCAGTCCAGGTCTTCCTC                                                                   |
| hsZMYM1 N-HA Fwd          | CAGGATCCGCCACCATGTACCCATACGATGTTCCAGATTACGCTGGAGCTA<br>AAGAACCCTTTTAGGTGGTGAG                  |
| hsZMYM1 Rev               | CTGCGGCCGCTTATATTTCTTTCATCTGACTGATAAAC                                                         |
| hsZMYM2 N-HA Fwd          | CAGGATCCGCCACCATGTACCCATACGATGTTCCAGATTACGCTGGAGCTG<br>ACACAAGTTCAGTGGGAGG                     |
| hsZMYM2 Rev               | GTGCGGCCGCTTAGTCTGTGTCTTCATCCAGTTC                                                             |
| hsZMYM4 N-HA Fwd          | CAGGATCCGCCACCATGTACCCATACGATGTTCCAGATTACGCTGGAGCTG<br>CGGAGAGAGAGGTGGAGTC                     |
| hsZMYM4 Rev               | GTGCGGCCGCTTAATCTGATAATTCAACATCAGAG                                                            |
| hsZMYM6 N-HA Fwd          | CAGGATCCGCCACCATGTACCCATACGATGTTCCAGATTACGCTGGAGCTA<br>AAGAACCCTTTGGATGGTGAATGTG               |
| hsZMYM6 Rev               | CTGCGGCCGCTACTCTTCTCCTTCACTAATTTTTTC                                                           |
| hsZMYM3Δ1124-<br>1370 Rev | CTGCGGCCGCTATTCTCTCTTCCGTTTTCCAGGACCCGTGTCTCGCCCTTTC<br>CTCTGGCGGACTG GAGTGATTTCTCTCACAACCTGGG |
| hsZMYM3Δ944-1370<br>Rev   | CTGCGGCCGCTATTCTCTCTTCCGTTTTCCAGGACCCGTGTCTCGCCCTTTC<br>CTCTGGCGGACTG GCTCAGCCTCTGCAATCATTTCTG |
| hsZMYM3Δ863-1370<br>Rev   | CTGCGGCCGCTATTCTCTCTTCCGTTTTCCAGGACCCGTGTCTCGCCCTTTC<br>CTCTGGCGGACTG GTGGCTTCCACTCTTCTGTTTGAC |
| hsZMYM3Δ1183-<br>1370 Rev | CTGCGGCCGCTATTCTCTCTTCCGTTTTCCAGGACCCGTGTCTCGCCCTTTC<br>CTCTGGCGGACTG GGTTGGGGAGGAGTGTGGGC     |
| hsZMYM3ΔPP Rev            | CATGGCAGCCTTGTTTTGCGAGCTGATCGGGTCTTCACAGG                                                      |
| hsZMYM3ΔPP Fwd            | CCTGTGAAGACCCGATCAGCTCGCAAAAACAAGGCTGCCATG                                                     |
| hsZMYM3Δ863-942<br>Rev    | CAGATGAGGCCTTGCTAACTCTGGCTTCCACTCTTCTGTTTGAC                                                   |
| hsZMYM3Δ863-942<br>Fwd    | GTCAAACAGAAGAGTGGAAGCCAGAGTTAGACAAGGCCTCATCTG                                                  |
| hsZMYM3-HA-ZF1<br>Fwd     | GCGAATTCGCCACCATGTACCCATACGATGTTCCAGATTACGCTGCAGTGG<br>GCACCAAGATGAC                           |
| hsZMYM3-HA-ZF2<br>Fwd     | GCGAATTCGCCACCATGTACCCATACGATGTTCCAGATTACGCTCTCACCAC<br>TTTCTCCAAGAAG                          |
| hsZMYM3-NLS-ZF1<br>Rev    | GCGGCCGCTATACCTTACGTTTCTTCTTAGGGGTCTTTTTGCCCGAGGGC                                             |
| hsZMYM3-NLS-ZF8<br>Rev    | GCGGCCGCTATACCTTACGTTTCTTCTTAGGAGTGATACAGCACAAGCCCA<br>G                                       |
| hsZMYM3-NLS-ZF9<br>Rev    | GCGGCCGCTATACCTTACGTTTCTTCTTAGGCCGGGCAGCCTTGCAGTAC                                             |
| hsZMYM3-NLS-<br>ZF10Rev   | GCGGCCGCTATACCTTACGTTTCTTCTTAGGTTGGTTCTGCTGGCTATAGAA<br>AC                                     |

|                         |                                                                    |
|-------------------------|--------------------------------------------------------------------|
| hsZMYM3-FLAG-ZF1<br>Fwd | GACTTAAGCCACCATGGACTACAAGGACGATGACGACAAGGCAGTGGGCA<br>CCAAGATGAC   |
| hsZMYM3-FLAG-ZF8<br>Fwd | GACTTAAGCCACCATGGACTACAAGGACGATGACGACAAGTGTGAGGACTT<br>CAAGCGGCTTC |
| hsZMYM3-FLAG-ZF9<br>Fwd | GACTTAAGCCACCATGGACTACAAGGACGATGACGACAAGGTGCTGCTGTA<br>CAAACAGGAC  |
| ΔZF89 Fwd               | CTTCGGGGTGTGGTGTCCCAGAAGAGCAAGTACCTGCTGTGG                         |
| ΔZF89 Rev               | CCACAGCAGGTACTIONGCTCTTCTGGGACACCACACCCCGAAG                       |
| 5' HA Fwd               | GCGATCGCGTTGCTGTCTGCAGTTCTAGG                                      |
| 5' HA Rev               | TGTACAGAATGGGAAAACCTTGAGTGCCTG                                     |
| 3' HA Fwd               | GCGGCCGCTCCCGTGTTTACTGATTCTTAG                                     |
| 3' HA Rev               | GTTTAAACAGACCCCATGTCAAGAAGGC                                       |
| Ex3 Fwd                 | TGTACATGATCAGTTTGGAGTAAATTGTTT                                     |
| Ex3 Rev                 | GCGGCCGCATAACTTCGTATAATGTATGCTATACGAAGTTATTCTGACAGCA<br>CCCCCCAAC  |
| 5' Probe Fwd            | CTCCTACAGGAGGATTCAGTG                                              |
| 5' Probe Rev            | GAGGAGGGGGCTCGCGAG                                                 |
| 3' Probe Fwd            | TGGCCCAGAAAGTCTTGTGTC                                              |
| 3' Probe Rev            | CAGGATCAGCTGATGAGAGAG                                              |
| ZESC2                   | AGCTGACACTAGTGGCAGGC                                               |
| ZESC3                   | CTTGCTCCTTTTAAGTGGTTAC                                             |
| ZESC4                   | TGCCAGTTTTCCAGATTAAGGC                                             |
| ZESC5                   | TTCCCACAACGGGTTCTTC                                                |
