# Supplementary material for: Aicardi–Goutières Syndrome associated mutations of RNase H2B impair its interaction with ZMYM3 and the CoREST histone-modifying complex
Source: PubMed Central journal article supplement (PMC6424451; doi:10.1371/journal.pone.0213553), 2019-03-19
Supplement: pone.0213553.s002.pdf [file pone.0213553.s002.pdf]

**Table S2. Antibodies**

| <b>Name</b>                            | <b>Host</b> | <b>Clonality</b> | <b>Conditions</b>             | <b>Source</b>                  |
|----------------------------------------|-------------|------------------|-------------------------------|--------------------------------|
| Rabbit anti-ZMYM3                      | Rabbit      | Polyclonal       | Western Blotting:<br>1:5000   | Bethyl<br>(A300-200A)          |
| Rabbit anti-RNase H2B                  | Rabbit      | Polyclonal       | Western Blotting:<br>1:1000   | Abcam<br>(ab122619)            |
| Rabbit anti-RNase H2C                  | Rabbit      | Polyclonal       | Western Blotting:<br>1:1000   | Abcam<br>(ab89726)             |
| Rabbit anti-GTFII-I                    | Rabbit      | Polyclonal       | Western Blotting:<br>1:50     | Abgent<br>(AP6881b)            |
| Rabbit anti-LSD1                       | Rabbit      | Polyclonal       | Western Blotting:<br>1:100    | Abgent<br>(AP1218c)            |
| Rabbit anti-HDAC2                      | Rabbit      | Polyclonal       | Western Blotting:<br>1:500    | GeneTex<br>(GTX112957)         |
| Rabbit anti-CoREST                     | Rabbit      | Polyclonal       | Western Blotting:<br>1:2000   | Millipore<br>(07-455)          |
| M2 anti-FLAG                           | Mouse       | Monoclonal       | Immunofluorescence:<br>1:1000 | Sigma<br>(F3165)               |
| Alexa Fluor® 568<br>Goat anti-Mouse    | Goat        | Monoclonal       | Immuno-flourescence:<br>1:400 | Life Technologies<br>(A21124)  |
| Mouse anti-FLAG M2<br>Peroxidase       | Mouse       | Monoclonal       | Western Blotting:<br>1:15000  | Sigma<br>(A8592)               |
| Goat anti-Rabbit IgG<br>Peroxidase     | Goat        | Monoclonal       | Western Blotting:<br>1:30000  | Novus Biologicals<br>(NB730-H) |
| TrueBlot anti-Rabbit<br>IgG Peroxidase | Goat        | Monoclonal       | Western Blotting<br>1:1000    | eBioscience<br>(18-8816)       |
| Goat anti-Mouse IgG<br>Peroxidase      | Goat        | Monoclonal       | Western blotting:<br>1:10000  | Novus Biologicals<br>(NB7539)  |
| Donkey anti-Goat<br>IgG Peroxidase     | Donkey      | Monoclonal       | Western Blotting:<br>1:10000  | Novus Biologicals<br>(NB7539)  |
| Mouse anti-HA                          | Mouse       | Monoclonal       | Immuno-flourescence<br>1:200  | Sigma<br>(H9658)               |
| Rat anti-HA<br>Peroxidase              | Rat         | Monoclonal       | Western Blotting:<br>1:1000   | Roche<br>(12013819001)         |
| Mouse anti- $\gamma$ -H2AX             | Mouse       | Monoclonal       | Western Blotting:<br>1:1000   | Millipore<br>(05-636)          |
| Mouse anti- $\alpha$ -<br>Tubulin      | Mouse       | Monoclonal       | Western Blotting:<br>1:1000   | Abcam<br>(ab7291)              |
