# Supplementary material for: Aicardi–Goutières Syndrome associated mutations of RNase H2B impair its interaction with ZMYM3 and the CoREST histone-modifying complex
Source: PubMed Central journal article supplement (PMC6424451; doi:10.1371/journal.pone.0213553), 2019-03-19

Related to Figure 1D:

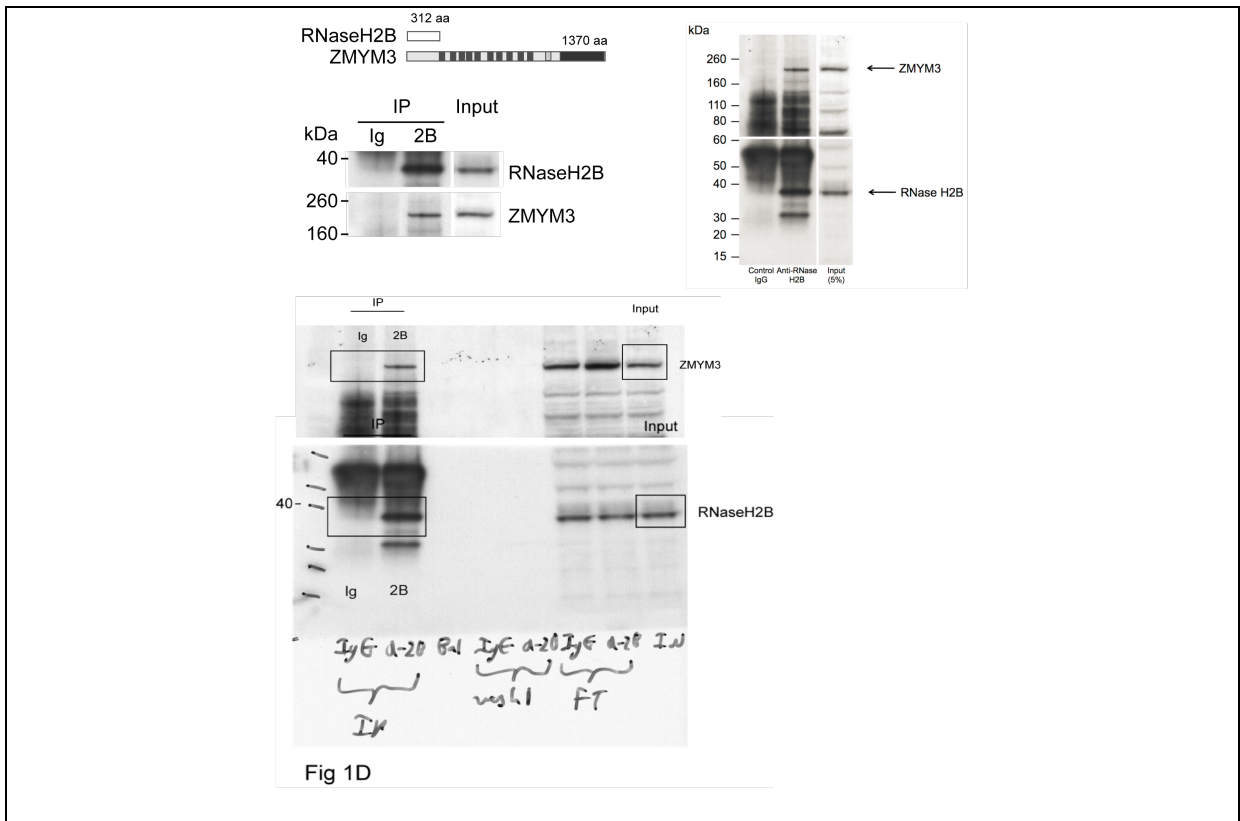

Related to Figure 2B and 2 C:

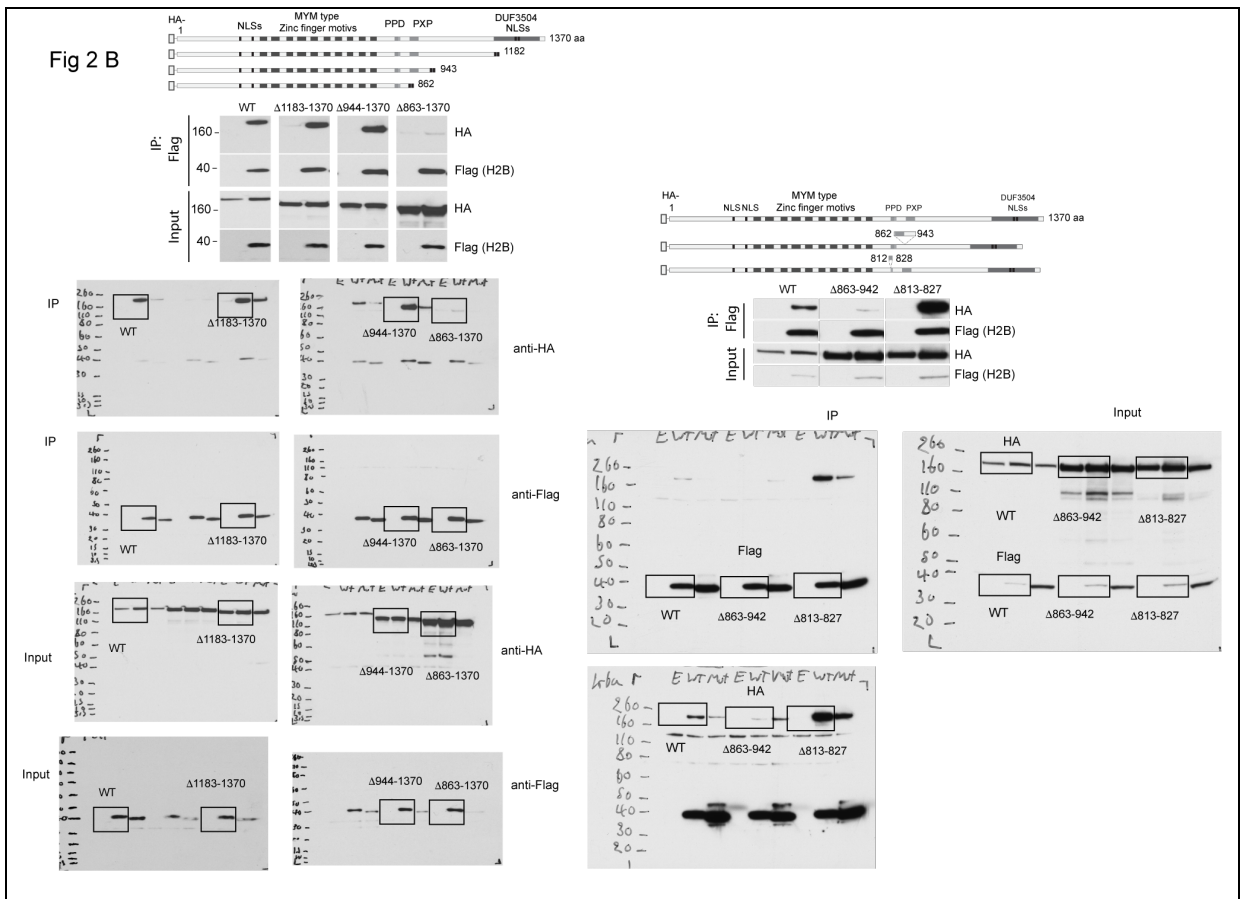

Related to Figure 3 A and 3 B

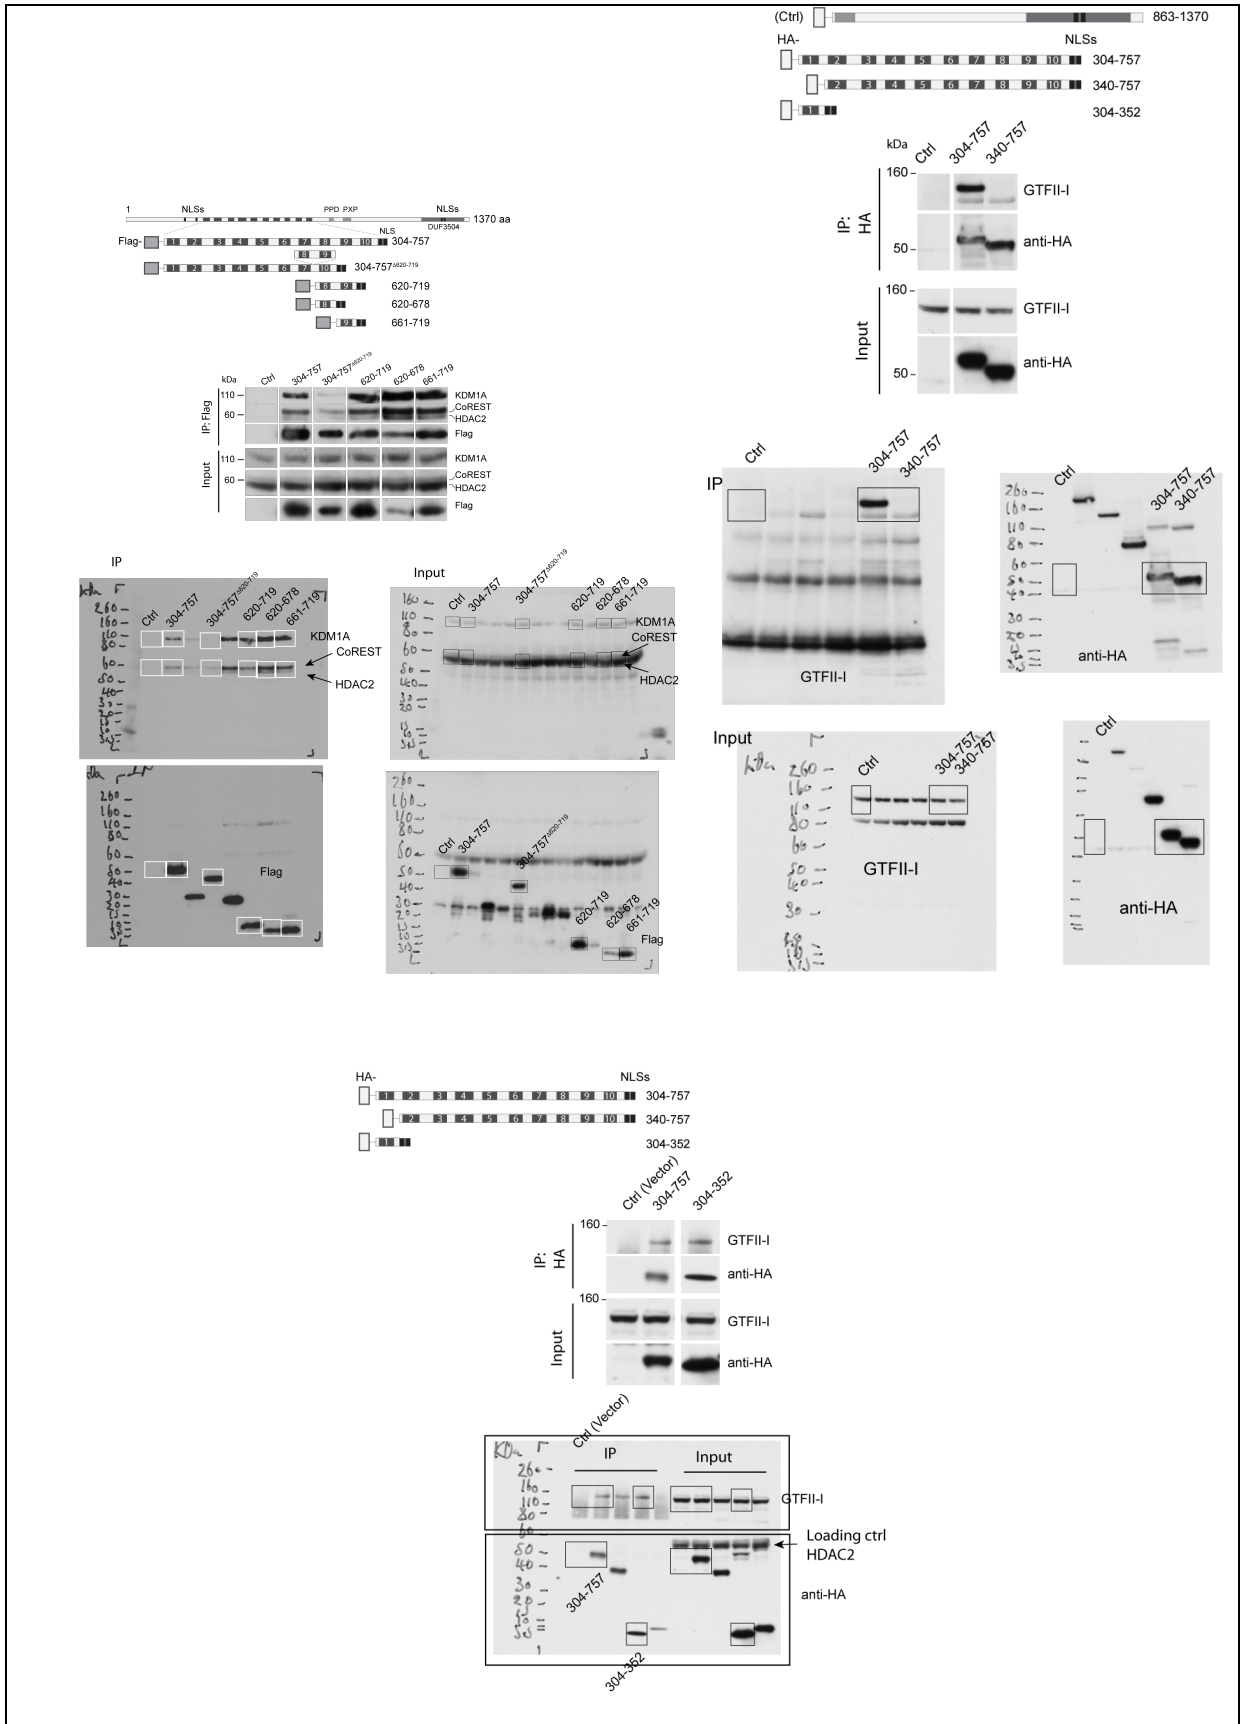

Related to Figure 4B, 4C and 4D:

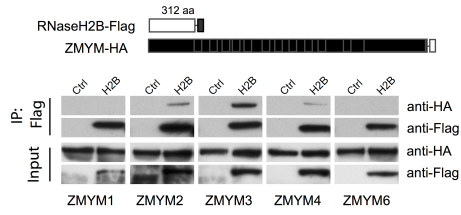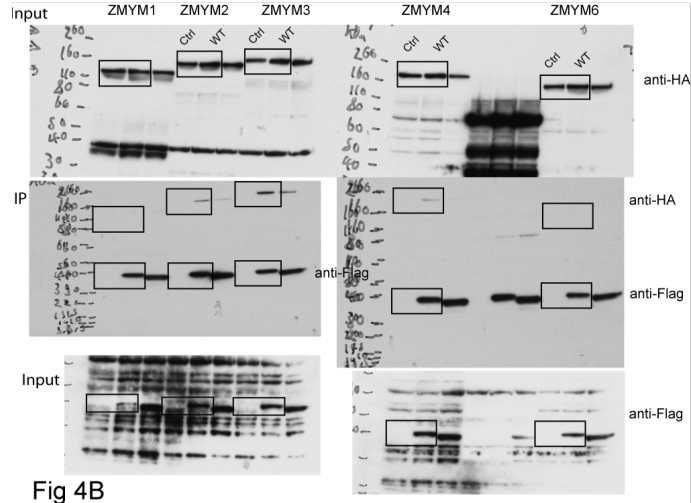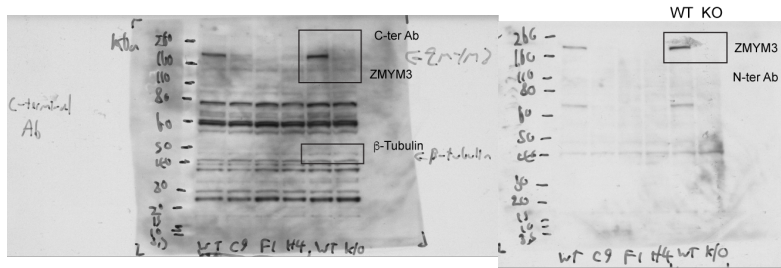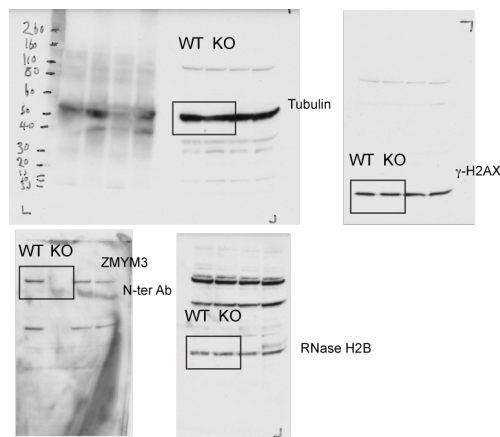

Supplement: pone.0213553.s009.pdf [file pone.0213553.s009.pdf]
